# Supplementary material
Source: Springer Nature journal article supplement (https://www.springermedizin.de/resource/supplementary/13229_2011_34_MOESM8_ESM.PDF/9676016)
Supplement: MOESM8 [file 9676016]

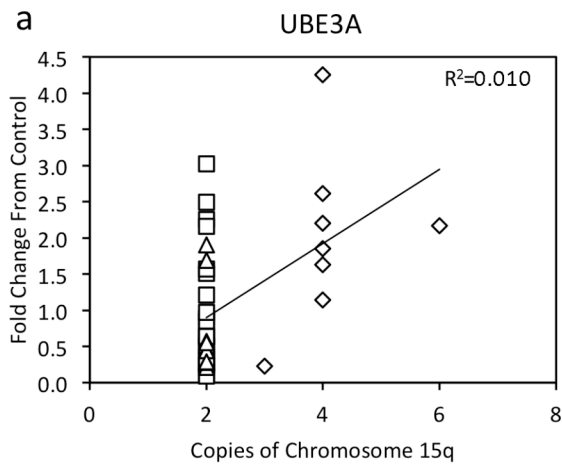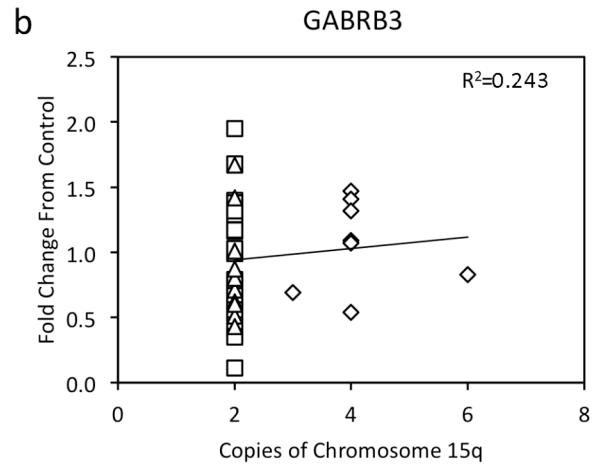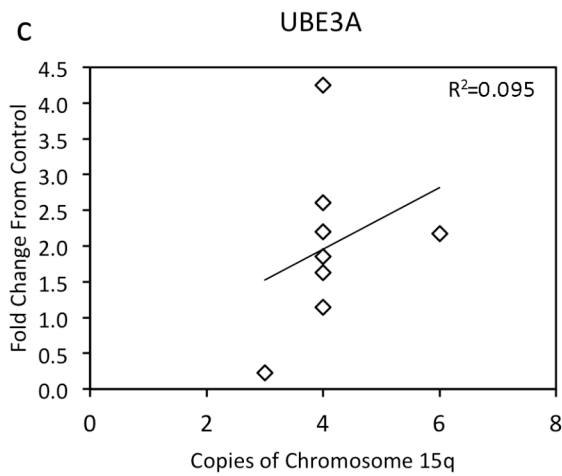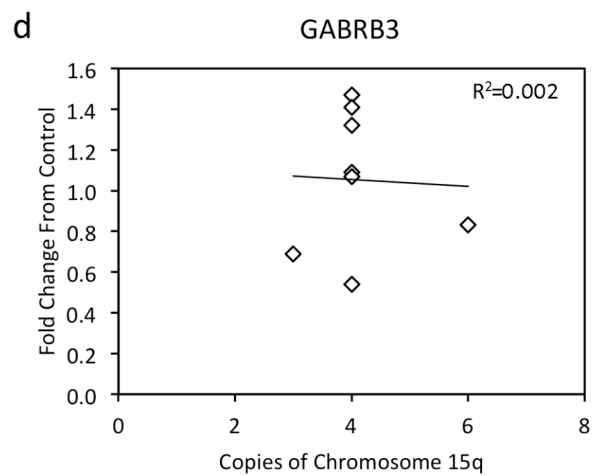

**Protein levels showed no significant association with copy number.** There was no significant relationship between UBE3A or GABRB3 protein levels in all cases (a-b) or in Dup15q only (c-d). Significance was calculated by a simple regression analysis. (◇ Dup15q, △ Autism, □ Control).
